# Supplementary material for: Deciphering the role of Fe impurities in the electrolyte boosting the OER activity of LaNiO3
Source: Royal Society of Chemistry journal article supplement (doi:10.1039/d3ta06733e), 2024-01-01
Supplement: d3ta06733e1.pdf [file d3ta06733e1.pdf]

# Deciphering the role of Fe impurities in the electrolyte boosting the OER activity of $\text{LaNiO}_3$

Haritha Cheraparambil<sup>1</sup>, Miquel Vega-Paredes<sup>2</sup>, Yue Wang<sup>1</sup>, Harun Tüysüz<sup>1</sup>, Christina Scheu<sup>2</sup>,  
Claudia Weidenthaler<sup>1\*</sup>

<sup>1</sup> Max-Planck-Institut für Kohlenforschung, Kaiser-Wilhelm-Platz 1, D-45470 Mülheim an der Ruhr, Germany

<sup>2</sup> Max-Planck-Institut für Eisenforschung, Max-Planck-Straße 1, D-40237 Düsseldorf, Germany

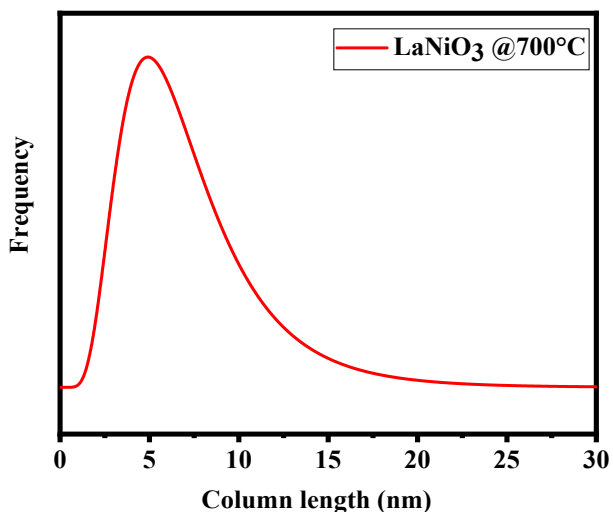

Figure S1. Column length distribution of  $\text{LaNiO}_3$  obtained at 700 °C.

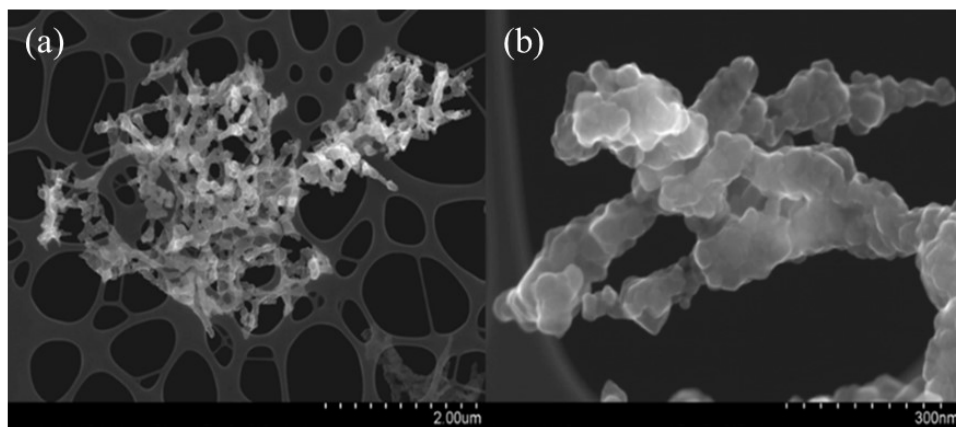

Figure S2. Scanning electron microscopy images of  $\text{LaNiO}_3$  shown in different magnifications (a) and (b).

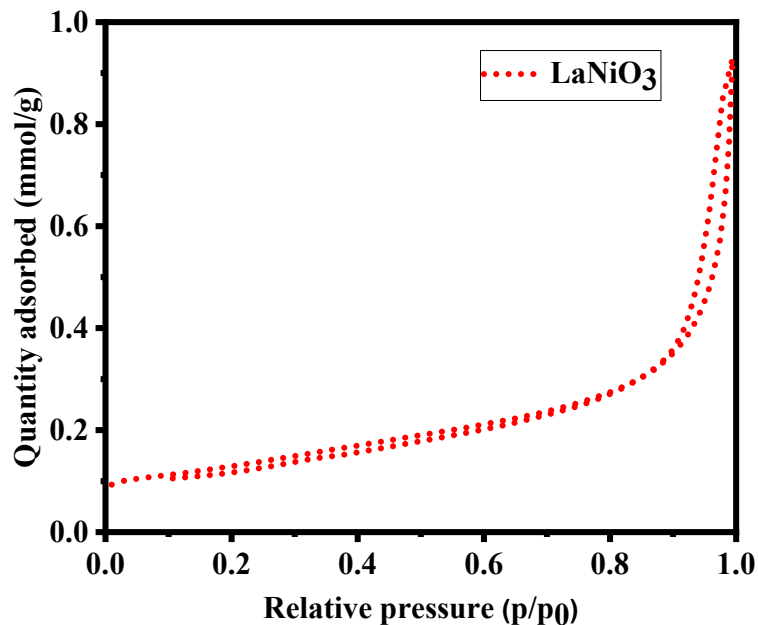

Figure S3. Nitrogen physisorption isotherms of  $\text{LaNiO}_3$ .

| <b>Electrolyte</b>                 | <b>Fe /ppm</b> |
|------------------------------------|----------------|
| 1 M commercial KOH solution        | 0.43           |
| Purified KOH solution              | 0.005          |
| Purified KOH solution + 1 ppm Fe   | 1.34           |
| Purified KOH solution + 3 ppm Fe   | 3.22           |
| Purified KOH solution + 7.5 ppm Fe | 7.60           |
| Purified KOH solution + 10 ppm Fe  | 10.65          |

Table S1. ICP-OES data of 1 M KOH under controlled addition of Fe impurities.

| <b>Samples</b>                     | <b><math>R_{\text{electrolyte}} / \Omega</math></b> | <b><math>R_{\text{ct}} / \Omega</math></b> |
|------------------------------------|-----------------------------------------------------|--------------------------------------------|
| Purified KOH solution              | 1.5                                                 | 10.8                                       |
| Purified KOH solution + 1 ppm Fe   | 1.5                                                 | 4.5                                        |
| Purified KOH solution + 3 ppm Fe   | 1.4                                                 | 1.4                                        |
| Purified KOH solution + 7.5 ppm Fe | 1.4                                                 | 0.6                                        |
| Purified KOH solution + 10 ppm Fe  | 1.8                                                 | 1.1                                        |

Table S2. Nyquist plot fits using the Randles circuit.

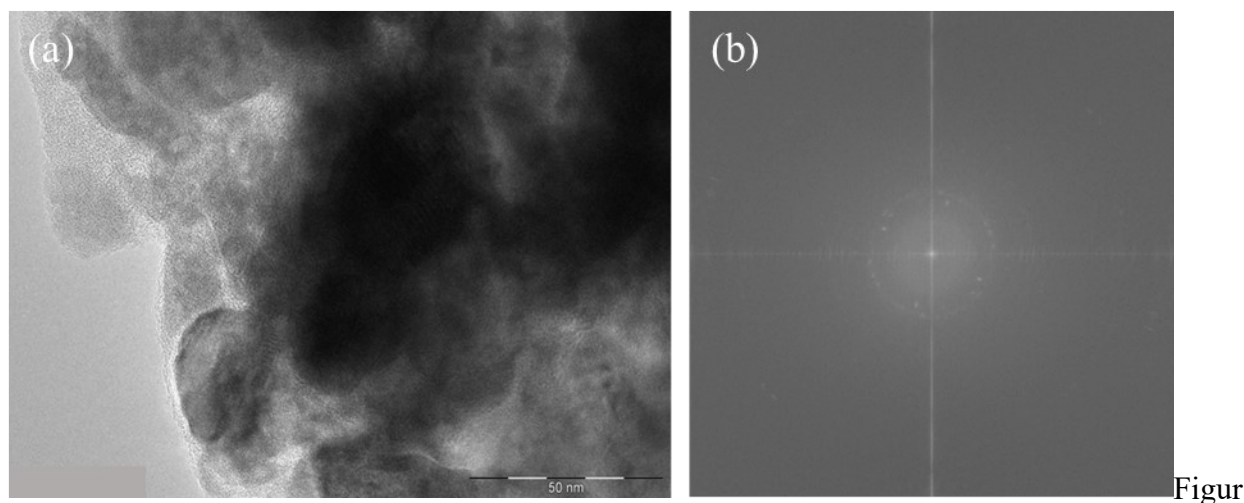

Figure S4. (a) TEM image and (b) its corresponding Fast Fourier Transform (FFT) of  $\text{LaNiO}_3$  obtained after the stability test. The presence of reflections in the FFT indicates that the crystallinity is preserved during the stability test.

| Raman shift /cm <sup>-1</sup> | Vibrational modes                                                    |
|-------------------------------|----------------------------------------------------------------------|
| ~156                          | Internal vibration of La                                             |
| ~209                          | Rotational vibration corresponding to structural distortion          |
| ~400, ~451                    | Vibration modes of the oxygen octahedra                              |
| ~474, ~555                    | Bending and stretching modes of Ni-O in NiOOH <sup>1</sup>           |
| ~825                          | O-O stretch of adsorbed *O-OH species on the Au surface <sup>2</sup> |

Table S3. Different Raman modes of LaNiO<sub>3</sub>.<sup>3,4</sup>

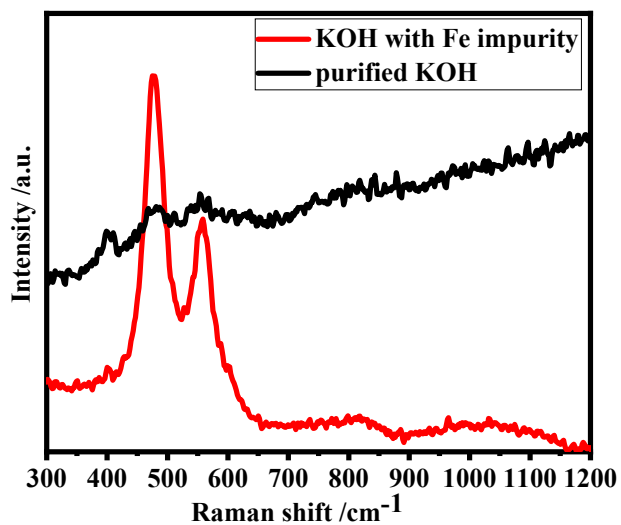

Figure S5. Comparison of Raman spectra of LaNiO<sub>3</sub> with the one obtained at a potential of 1.5 V in 1 M KOH with additional Fe impurities.

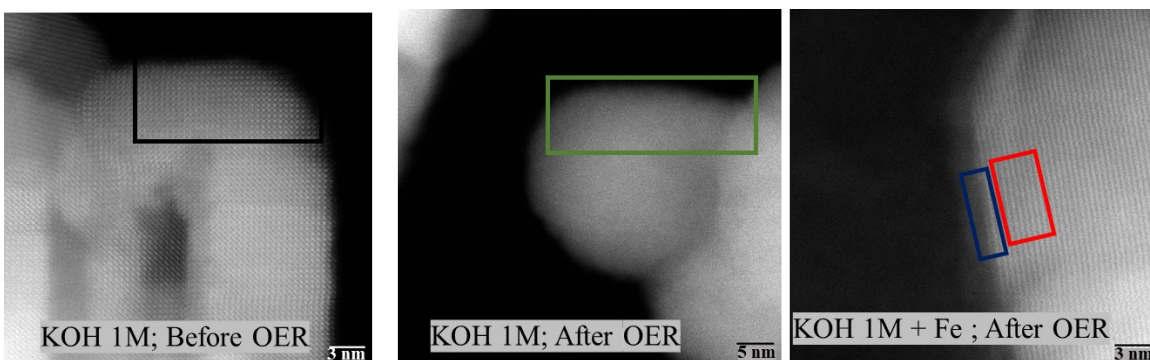

Figure S6. STEM images of  $\text{LaNiO}_3$  under different conditions. The EELS spectra are collected from the respective marked regions; before OER (black colour), after OER in 1M KOH (green colour), nanoparticles after OER in 1M KOH with Fe impurities, the amorphous layer formed after OER in 1M KOH with Fe impurities.

| <b>Sample</b>          | <b>La (ppm)</b> | <b>Ni (ppm)</b> | <b>Fe (ppm)</b> |
|------------------------|-----------------|-----------------|-----------------|
| Electrolyte before OER | -               | -               | 7.6             |
| Electrolyte after OER  | 0.4             | -               | 5.8             |

Table S4. ICP-OES data of the electrolyte before and after OER.

## REFERENCES

1. L. Trotochaud, S. L. Young, J. K. Ranney and S. W. Boettcher, *J Am Chem Soc*, 2014, **136**, 6744-6753.
2. E. Budiyanto, S. Salamon, Y. Wang, H. Wende and H. Tuysuz, *JACS Au*, 2022, **2**, 697-710.
3. N. Chaban, M. Weber, S. Pignard and J. Kreisel, *Applied Physics Letters*, 2010, **97**.
4. A. Schober, J. Fowlie, M. Guennou, M. C. Weber, H. Zhao, J. Íñiguez, M. Gibert, J.-M. Triscone and J. Kreisel, *APL Materials*, 2020, **8**.
